# Supplementary material
Source: ML conference proceedings conference paper supplement (https://proceedings.neurips.cc/paper_files/paper/2020/hash/b98249b38337c5088bbc660d8f872d6a-Abstract.html)
Supplement: Supplementary file [file b98249b38337c5088bbc660d8f872d6a-Supplemental.pdf]

---

# Domain Generalization via Entropy Regularization -Supplementary Materials-

---

**Shanshan Zhao**

The University of Sydney  
Australia

szha4333@uni.sydney.edu.au

**Mingming Gong**

University of Melbourne  
Australia

mingming.gong@unimelb.edu.au

**Tongliang Liu**

The University of Sydney  
Australia

tongliang.liu@sydney.edu.au

**Huan Fu**

Alibaba Group  
China

fuhuan.fh@alibaba-inc.com

**Dacheng Tao**

The University of Sydney  
Australia

dacheng.tao@sydney.edu.au

Here, we provide the proofs and the illustration of our framework supporting the contents in the submission.

## S. 1 Proof of Theorem 1

*Proof.* According to the definition of mutual information and under the assumption that all classes are equally likely, we have:

$$\begin{aligned}
& -H_{P_i}(Y|F(X)) \\
& = I_{P_i}(Y, F(X)) - H(Y) \\
& = H_{P_i}(F(X)) - H_{P_i}(F(X)|Y) - H(Y) \\
& = -\frac{1}{C} \sum_{c=1}^C \mathbb{E}_{X' \sim P_i^F(X|Y)} \log P_i(X') + \frac{1}{C} \sum_{c=1}^C \mathbb{E}_{X' \sim P_i^F(X|Y)} \log P_i(X'|Y=c) - H(Y) \\
& = \frac{1}{C} \sum_{c=1}^C \mathbb{E}_{X' \sim P_i^F(X|Y)} \log \frac{P_i(X'|Y=c)}{P_i(X')} - H(Y) \tag{S. 1} \\
& = \frac{1}{C} \sum_{c=1}^C KL(P_i(X'|Y=c) || P_i(X')) - H(Y) \\
& = \frac{1}{C} \sum_{c=1}^C KL(P_i(F(X)|Y=c) || P_i(F(X))) - H(Y) \\
& = JSD(P_i(F(X)|Y=1), P_i(F(X)|Y=2), \dots, P_i(F(X)|Y=C)) - H(Y).
\end{aligned}$$

Since  $H(Y)$  is a constant, then minimizing  $-H_{P_i}(Y|F(X))$  is equivalent to minimizing  $JSD(P_i(F(X)|Y=1), P_i(F(X)|Y=2), \dots, P_i(F(X)|Y=C))$ , the global minimum of which is achieved at  $P_i(F(X)|Y=1) = P_i(F(X)|Y=2) = \dots = P_i(F(X)|Y=C)$ .  $\square$

## S. 2 Proof of Theorem 2

**S. Proposition 1.** Let  $V(F, \{T'_i\}) = \sum_{i=1}^K \mathbb{E}_{(X,Y) \sim P_i(X,Y)} [\log Q_i^{T'_i}(Y|F(X))]$ . Then the optimal prediction probabilities of  $T'_i$  are

$$\langle T_i^{T'^*}(\mathbf{x}'_i) \rangle_c = Q_i^{T'^*}(Y = c | \mathbf{x}'_i) = \frac{P_i(\mathbf{x}'_i | Y = c)}{\sum_{c=1}^C P_i(\mathbf{x}'_i | Y = c)}, \quad (\text{S. 2})$$

where  $\langle \mathbf{z} \rangle_i$  denotes the  $i^{\text{th}}$  element of  $\mathbf{z}$ , and  $\mathbf{x}'_i = F(\mathbf{x}_i)$ .

*Proof.* For a fixed  $F$ ,  $\min_F \max_{\{T'_i\}} V(F, \{T'_i\})$  reduces to maximizing  $V(F, \{T'_i\}_{i=1}^K)$  w.r.t.  $\{T'_1, T'_2, \dots, T'_K\}^1$ :

$$\begin{aligned} & \{\langle T_i^{T'^*}(\mathbf{x}') \rangle_1, \langle T_i^{T'^*}(\mathbf{x}') \rangle_2, \dots, \langle T_i^{T'^*}(\mathbf{x}') \rangle_C\} \\ = & \arg \max_{\{\langle T'_i(\mathbf{x}') \rangle_c\}_{c=1}^C} \sum_{c=1}^C \int_{\mathbf{x}'_i} P_i(\mathbf{x}'_i | Y = c) \log(\langle T'_i(\mathbf{x}') \rangle_c) d\mathbf{x}'_i, \\ \text{s.t. } & \sum_{c=1}^C \langle T'_i(\mathbf{x}') \rangle_c = 1. \end{aligned} \quad (\text{S. 3})$$

Maximizing the value function point-wisely and applying Lagrange multipliers, we obtain the following problem:

$$\begin{aligned} & \{\langle T_i^{T'^*}(\mathbf{x}') \rangle_1, \langle T_i^{T'^*}(\mathbf{x}') \rangle_2, \dots, \langle T_i^{T'^*}(\mathbf{x}') \rangle_C\} \\ = & \arg \max_{\{\langle T'_i(\mathbf{x}') \rangle_c\}_{c=1}^C} \sum_{c=1}^C P_i(\mathbf{x}'_i | Y = c) \log(\langle T'_i(\mathbf{x}') \rangle_c) + \lambda_i (\sum_{c=1}^C \langle T'_i(\mathbf{x}') \rangle_c - 1). \end{aligned} \quad (\text{S. 4})$$

Setting the derivative of Eq. S. 4 w.r.t.  $\langle T'_i(\mathbf{x}') \rangle_c$  to zero, we obtain  $\langle T_i^{T'^*}(\mathbf{x}') \rangle_c = -\frac{P_i(\mathbf{x}'_i | Y = c)}{\lambda_i}$ . Through substituting the value of  $\langle T_i^{T'^*}(\mathbf{x}') \rangle_c$  into the constraint  $\sum_{c=1}^C \langle T'_i(\mathbf{x}') \rangle_c = 1$ , we can obtain  $\lambda_i = -\sum_{c=1}^C P_i(\mathbf{x}'_i | Y = c)$ , and thus get the optimal solution  $\langle T_i^{T'^*}(\mathbf{x}') \rangle_c = \frac{P_i(\mathbf{x}'_i | Y = c)}{\sum_{c=1}^C P_i(\mathbf{x}'_i | Y = c)}$ .  $\square$

**S. Theorem 1.** If  $U(F)$  is the maximum value of  $V(F, \{T'_i\}_{i=1}^K)$ , i.e.,

$$U(F) = \sum_{i=1}^K \sum_{c=1}^C \mathbb{E}_{X_i \sim P_i(X)} \left[ \log \frac{P_i(X'_i | Y = c)}{\sum_{c=1}^C P_i(X'_i | Y = c)} \right], \quad (\text{S. 5})$$

the global minimum of the minimax game is attained if and only if  $P_i(X'_i | Y = 1) = P_i(X'_i | Y = 2) = \dots = P_i(X'_i | Y = C)$  for any  $i \in \{1, 2, \dots, K\}$ , where  $U(F)$  achieves the value  $-KC \log C$ .

*Proof.* Adding  $KC \log C$  to  $U(F)$  can obtain:

$$\begin{aligned} U(F) + KC \log C &= \sum_{i=1}^K \sum_{c=1}^C \mathbb{E}_{X_i \sim P_i(X)} \left[ \log \frac{P_i(X'_i | Y = c)}{\sum_{c=1}^C P_i(X'_i | Y = c)} \right] + \log C \\ &= \sum_{i=1}^K \sum_{c=1}^C \mathbb{E}_{X_i \sim P_i(X)} \left[ \log \frac{P_i(X'_i | Y = c)}{\frac{1}{C} \sum_{c=1}^C P_i(X'_i | Y = c)} \right] \\ &= \sum_{i=1}^K \sum_{c=1}^C KL(P_i(X'_i | Y = c) \parallel \frac{1}{C} \sum_{c=1}^C P_i(X'_i | Y = c)). \end{aligned} \quad (\text{S. 6})$$

According to the definition of the Jensen-Shannon divergence, we can obtain  $U(F) = -KC \log C + \sum_{i=1}^K C \cdot \text{JSD}(P_i(X'_i | Y = 1), P_i(X'_i | Y = 2), \dots, P_i(X'_i | Y = C))$ . Since the JSD between

<sup>1</sup>Here, we only consider  $T'_i$  for simplicity.

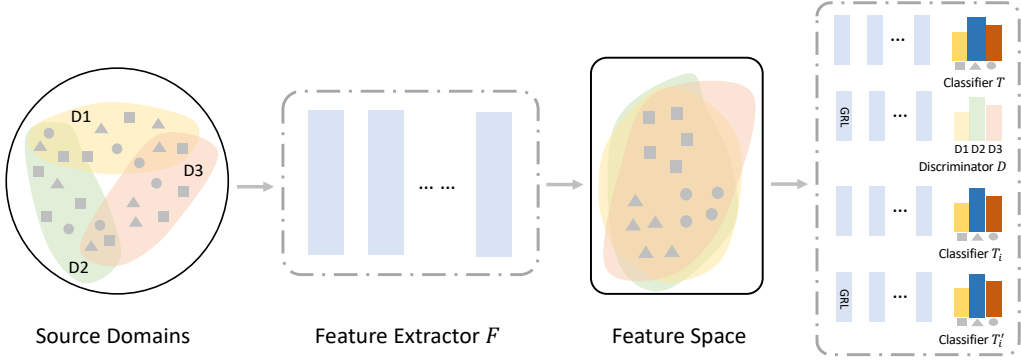

S. Figure 1: Illustration of our framework. GRL represents the gradient reversal layer. All components are trained, but only  $F$  and  $T$  are preserved for test.

multiple distributions is always non-negative, and zero iff they are equal, then we have

$$\begin{aligned}
 P_1(X'_1|Y = 1) &= P_1(X'_1|Y = 2) = \dots = P_1(X'_1|Y = C), \\
 P_2(X'_2|Y = 1) &= P_2(X'_2|Y = 2) = \dots = P_2(X'_2|Y = C), \\
 &\dots \\
 P_K(X'_K|Y = 1) &= P_K(X'_K|Y = 2) = \dots = P_K(X'_K|Y = C),
 \end{aligned} \tag{S. 7}$$

and the global minimum of  $U(F)$  is  $-KC \log C$ . □

### S. 3 Framework

Here, we provide an illustration of our framework in S. Figure 1 for better understanding of the proposed components. The main module consists of a feature extractor  $F$  and a classifier  $T$ . In addition, we exploit a domain discriminator  $D$  to discriminate domains, and  $2K$  classifiers ( $\{T_i\}_{i=1}^K$  and  $\{T'_i\}_{i=1}^K$ ) to regularize the generated features. We insert a gradient reversal layer (GRL) [1] between  $F$  and  $D$ , and  $F$  and  $T'_i$ , respectively. In the inference stage, only the main module ( $F$  and  $T$ ) is required.

### References

- [1] Yaroslav Ganin and Victor S. Lempitsky. Unsupervised domain adaptation by backpropagation. In *ICML*, 2015.
